# Supplementary material for: Biological Activities of Ethanolic Extracts from Deep-Sea Antarctic Marine Sponges
Source: PubMed Central journal article supplement (PMC3705393; doi:10.3390/md11041126), 2013-04-02
Supplement: marinedrugs-11-01126-s001.pdf [file marinedrugs-11-01126-s001.pdf]

## Supplementary Information

**Table S1.** The sponge species used in this study, and the dry weights of their ethanolic extracts.

| Sponge species                                          | S#   | Extract dry weight (mg/mL) |
|---------------------------------------------------------|------|----------------------------|
| <i>Rossella</i> cf. <i>nuda/vanhoeffeni</i>             | 3    | 3.8                        |
| <i>Rossella</i> sp.                                     | 4    | 4.7                        |
| <i>Tethyopsis</i> sp.                                   | 6    | 4.6                        |
| <i>Bathydorus spinosus</i>                              | 8    | 3.6                        |
| non-identified sponge 1                                 | 10   | 3.3                        |
| <i>Myxilla</i> sp.                                      | 26   | 7.4                        |
| <i>Chinachyra</i> cf. <i>barbata</i>                    | 27   | 3.5                        |
| <i>Rossella</i> sp.                                     | 34   | 6.5                        |
| Demospongiae spp.                                       | 36   | 3.7                        |
| <i>Rossella ractovitzae</i> Topsent                     | 37/R | 5.7                        |
| <i>Latrunculia</i> cf. <i>lendenfeldi</i>               | 37/L | 9                          |
| Demospongiae spp.                                       | 38   | 5.4                        |
| <i>Haliclona</i> ( <i>Gellius</i> ) <i>flagellifera</i> | 40a  | 7.2                        |
| <i>Hemigellius bidens</i>                               | 41a  | 5.9                        |
| Microcionidae spp.                                      | 41   | 4.5                        |
| <i>Rossella</i> cf. <i>racovitzae</i>                   | 43   | 6.4                        |
| <i>Halichondria osculum</i>                             | 45h  | 3.1                        |
| Demospongiae sp.                                        | 45d  | 3.9                        |
| <i>Lantrunculia</i> cf. <i>bocagei</i>                  | 46   | 7.2                        |
| <i>Xestospongia</i> sp.                                 | 48/1 | 4                          |
| non-identified sponge 2                                 | 48/2 | 6.9                        |
| <i>Isodictya toxophila</i>                              | 51   | 4.3                        |
| <i>Homaxinella balfouriensis</i>                        | 52   | 4.6                        |
| <i>Tetilla leptoderma</i>                               | 55   | 4.2                        |
| <i>Haliclona flagellifera</i>                           | 56   | 5.3                        |
| <i>Isodictya setifera</i>                               | 58   | 6.5                        |
| Suberitidae gen. sp.                                    | 63   | 4.2                        |
| Demospongiae sp.                                        | 105  | 4.9                        |
| <i>Tetilla leptoderma</i>                               | 119  | 10.3                       |
| Demospongiae sp.                                        | 124  | 5                          |
| <i>Rossella</i> cf. <i>nuda/vanhoeffeni</i>             | 132  | 6.1                        |
| <i>Rossella</i> cf. <i>racovitzae</i>                   | 166  | 6.5                        |
| <i>Rossella</i> cf. <i>racovitzae</i>                   | 167  | 3.8                        |

S#: sponge extract code.

**Table S2.** Antibacterial activities (MICs) of selected antibiotics against the laboratory, commensal and clinically relevant bacteria strains.

| Bacterial strain                                       | Antibiotic MIC ( $\mu\text{g/mL}$ ) |                 |           |            |            |
|--------------------------------------------------------|-------------------------------------|-----------------|-----------|------------|------------|
|                                                        | Tetracycline                        | Chloramphenicol | Kanamycin | Ampicillin | Rifampicin |
| <i>Staphylococcus aureus</i> (MRSA) S-943 <sup>A</sup> | 80                                  | 7               | 9         | 700        | 0.005      |
| <i>S. pseudintermedius</i> (MRSP) S-053 <sup>A</sup>   | 2                                   | 500             | 250       | 3000       | 0.05       |
| <i>S. pseudintermedius</i> (MRSP) S-043 <sup>A</sup>   | 50                                  | 8               | 250       | 700        | 0.06       |
| <i>Listeria monocytogenes</i>                          | 80                                  | 5               | 2.5       | 250        | 0.008      |
| <i>Staphylococcus epidermidis</i> EXB-V55              | 0.2                                 | 4               | 0.4       | 0.8        | 0.02       |
| <i>Staphylococcus aureus</i> 10F                       | 2                                   | 20              | 8         | 0.7        | 0.5        |
| <i>Bacillus subtilis</i> EXB-V68                       | 0.03                                | 0.8             | 8         | 2          | 0.07       |
| <i>Micrococcus</i> 1F                                  | 0.15                                | 9               | 0.09      | 0.5        | 0.007      |
| <i>Micrococcus</i> 2F                                  | 0.2                                 | 2               | 8         | 0.5        | 0.009      |
| <i>Escherichia coli</i> HB101                          | 0.5                                 | 5               | 80        | 70         | 90         |
| <i>Escherichia coli</i> EXB-V1                         | 2                                   | 0.9             | 6         | 2000       | 8          |
| ESBL- <i>E. coli</i> 206 (CTX-M-1; ST131) <sup>A</sup> | 9                                   | 4               | 90        | 500        | 8          |
| ESBL- <i>E. coli</i> 192 (CTX-M-9; ST131) <sup>A</sup> | 0.5                                 | 3               | 9         | 5000       | 20         |
| ESBL- <i>E. coli</i> MS 30 (CTX-M-2) <sup>A</sup>      | 9                                   | 0.9             | 7         | >10,000    | 20         |
| <i>Acinetobacter</i> 1C                                | 0.05                                | 9               | 200       | 5000       | 0.2        |
| KPC- <i>Klebsiella pneumoniae</i> <sup>A</sup>         | 4                                   | 900             | 900       | >10,000    | 70         |
| <i>Enterobacter</i> EXB-V11                            | 4                                   | 7               | 70        | 200        | 70         |
| <i>Pseudomonas aeruginosa</i> EXB-V28                  | 9                                   | 0.9             | 80        | 500        | 60         |
| <i>Pseudomonas aeruginosa</i> 06131 <sup>A</sup>       | 20                                  | 7               | 60        | 200        | 15         |
| <i>Pseudomonas aeruginosa</i> 8591 <sup>A</sup>        | 9                                   | 90              | 80        | 5000       | 60         |

A: multiresistant isolate.
